# Supplementary material for: β-Sitosterol Glucoside-Loaded Nanosystem Ameliorates Insulin Resistance and Oxidative Stress in Streptozotocin-Induced Diabetic Rats
Source: MDPI journal article supplement (doi:10.3390/antiox11051023), 2022-05-22
Supplement: s1 [file s1]

Supplementary Material

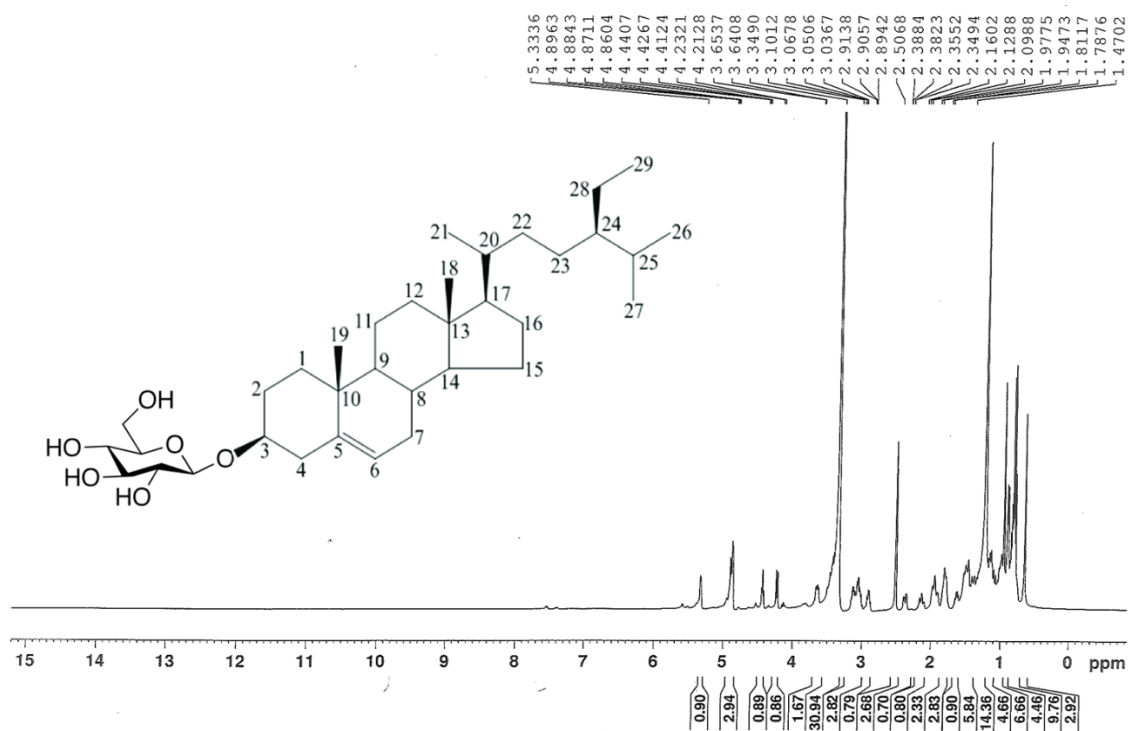

**Figure S1.**  $^1\text{H}$ -NMR spectrum of the isolated compound ( $\beta$ -Sitosterol glucoside) in  $\text{DMSO-d}_6$ .
